# Supplementary material for: Conservation status and historical relatedness of Italian cattle breeds
Source: PubMed Central journal article supplement (PMC6019226; doi:10.1186/s12711-018-0406-x), 2018-06-26
Supplement: 12711_2018_406_MOESM7_ESM.pdf [file 12711_2018_406_MOESM7_ESM.pdf]

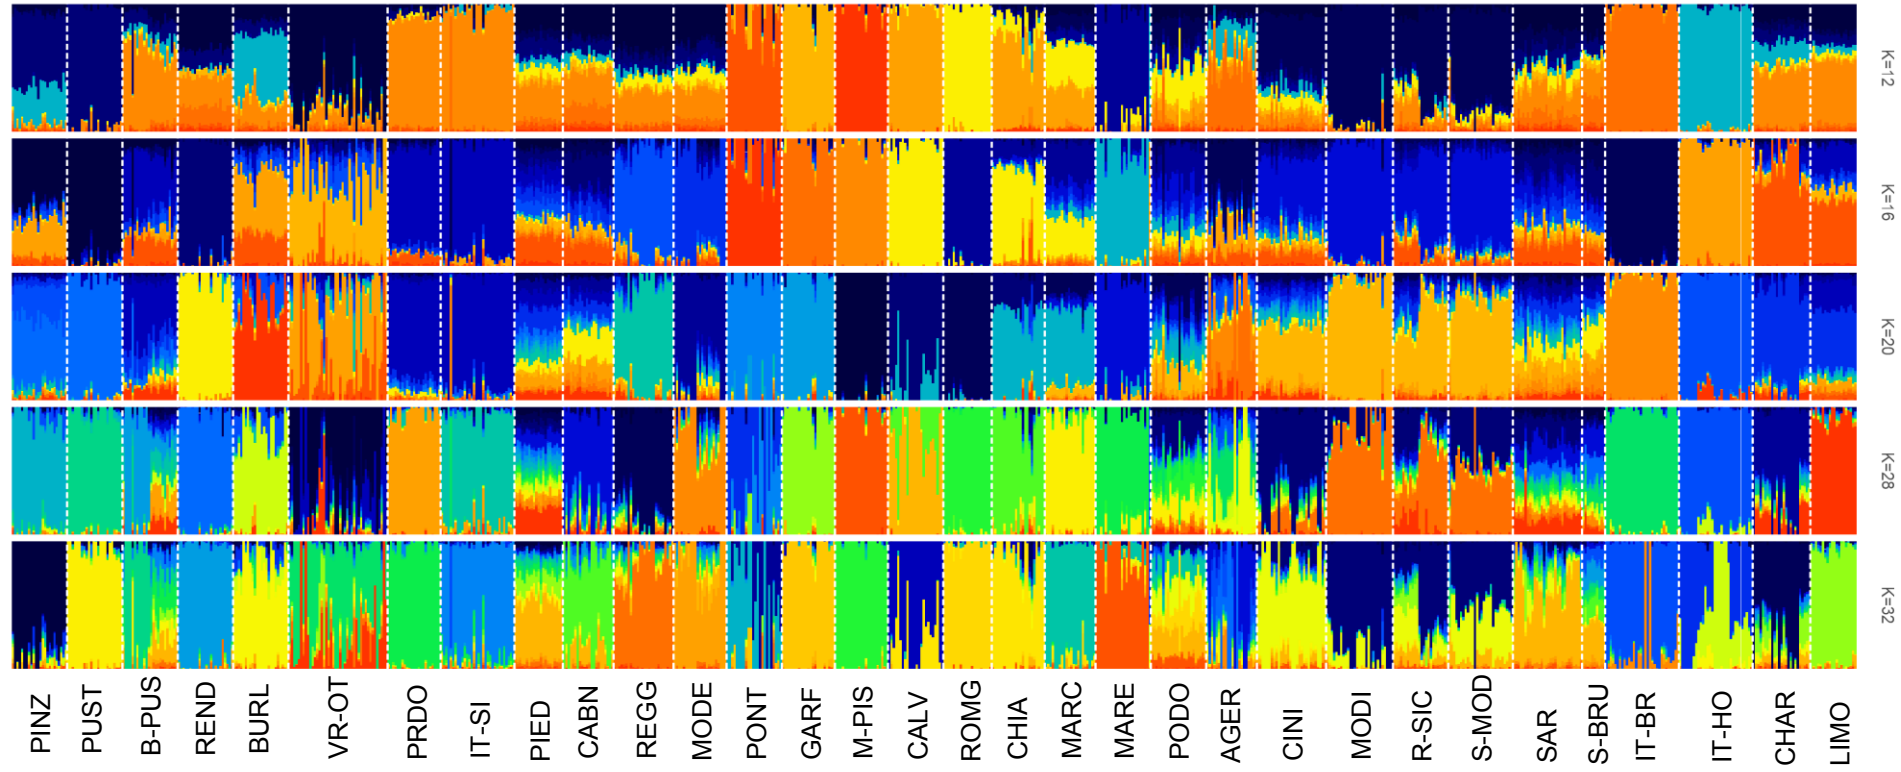

K=12

K=16

K=20

K=28

K=32

PINZ  
PUST  
B-PUS  
REND  
BURL  
VR-OT  
PRDO  
IT-SI  
PIED  
CABN  
REGG  
MODE  
PONT  
GARF  
M-PIS  
CALV  
ROMG  
CHIA  
MARC  
MARE  
PODO  
AGER  
CINI  
MODI  
R-SIC  
S-MOD  
SAR  
S-BRU  
IT-BR  
IT-HO  
CHAR  
LIMO
