# Supplementary material for: Conservation status and historical relatedness of Italian cattle breeds
Source: PubMed Central journal article supplement (PMC6019226; doi:10.1186/s12711-018-0406-x), 2018-06-26

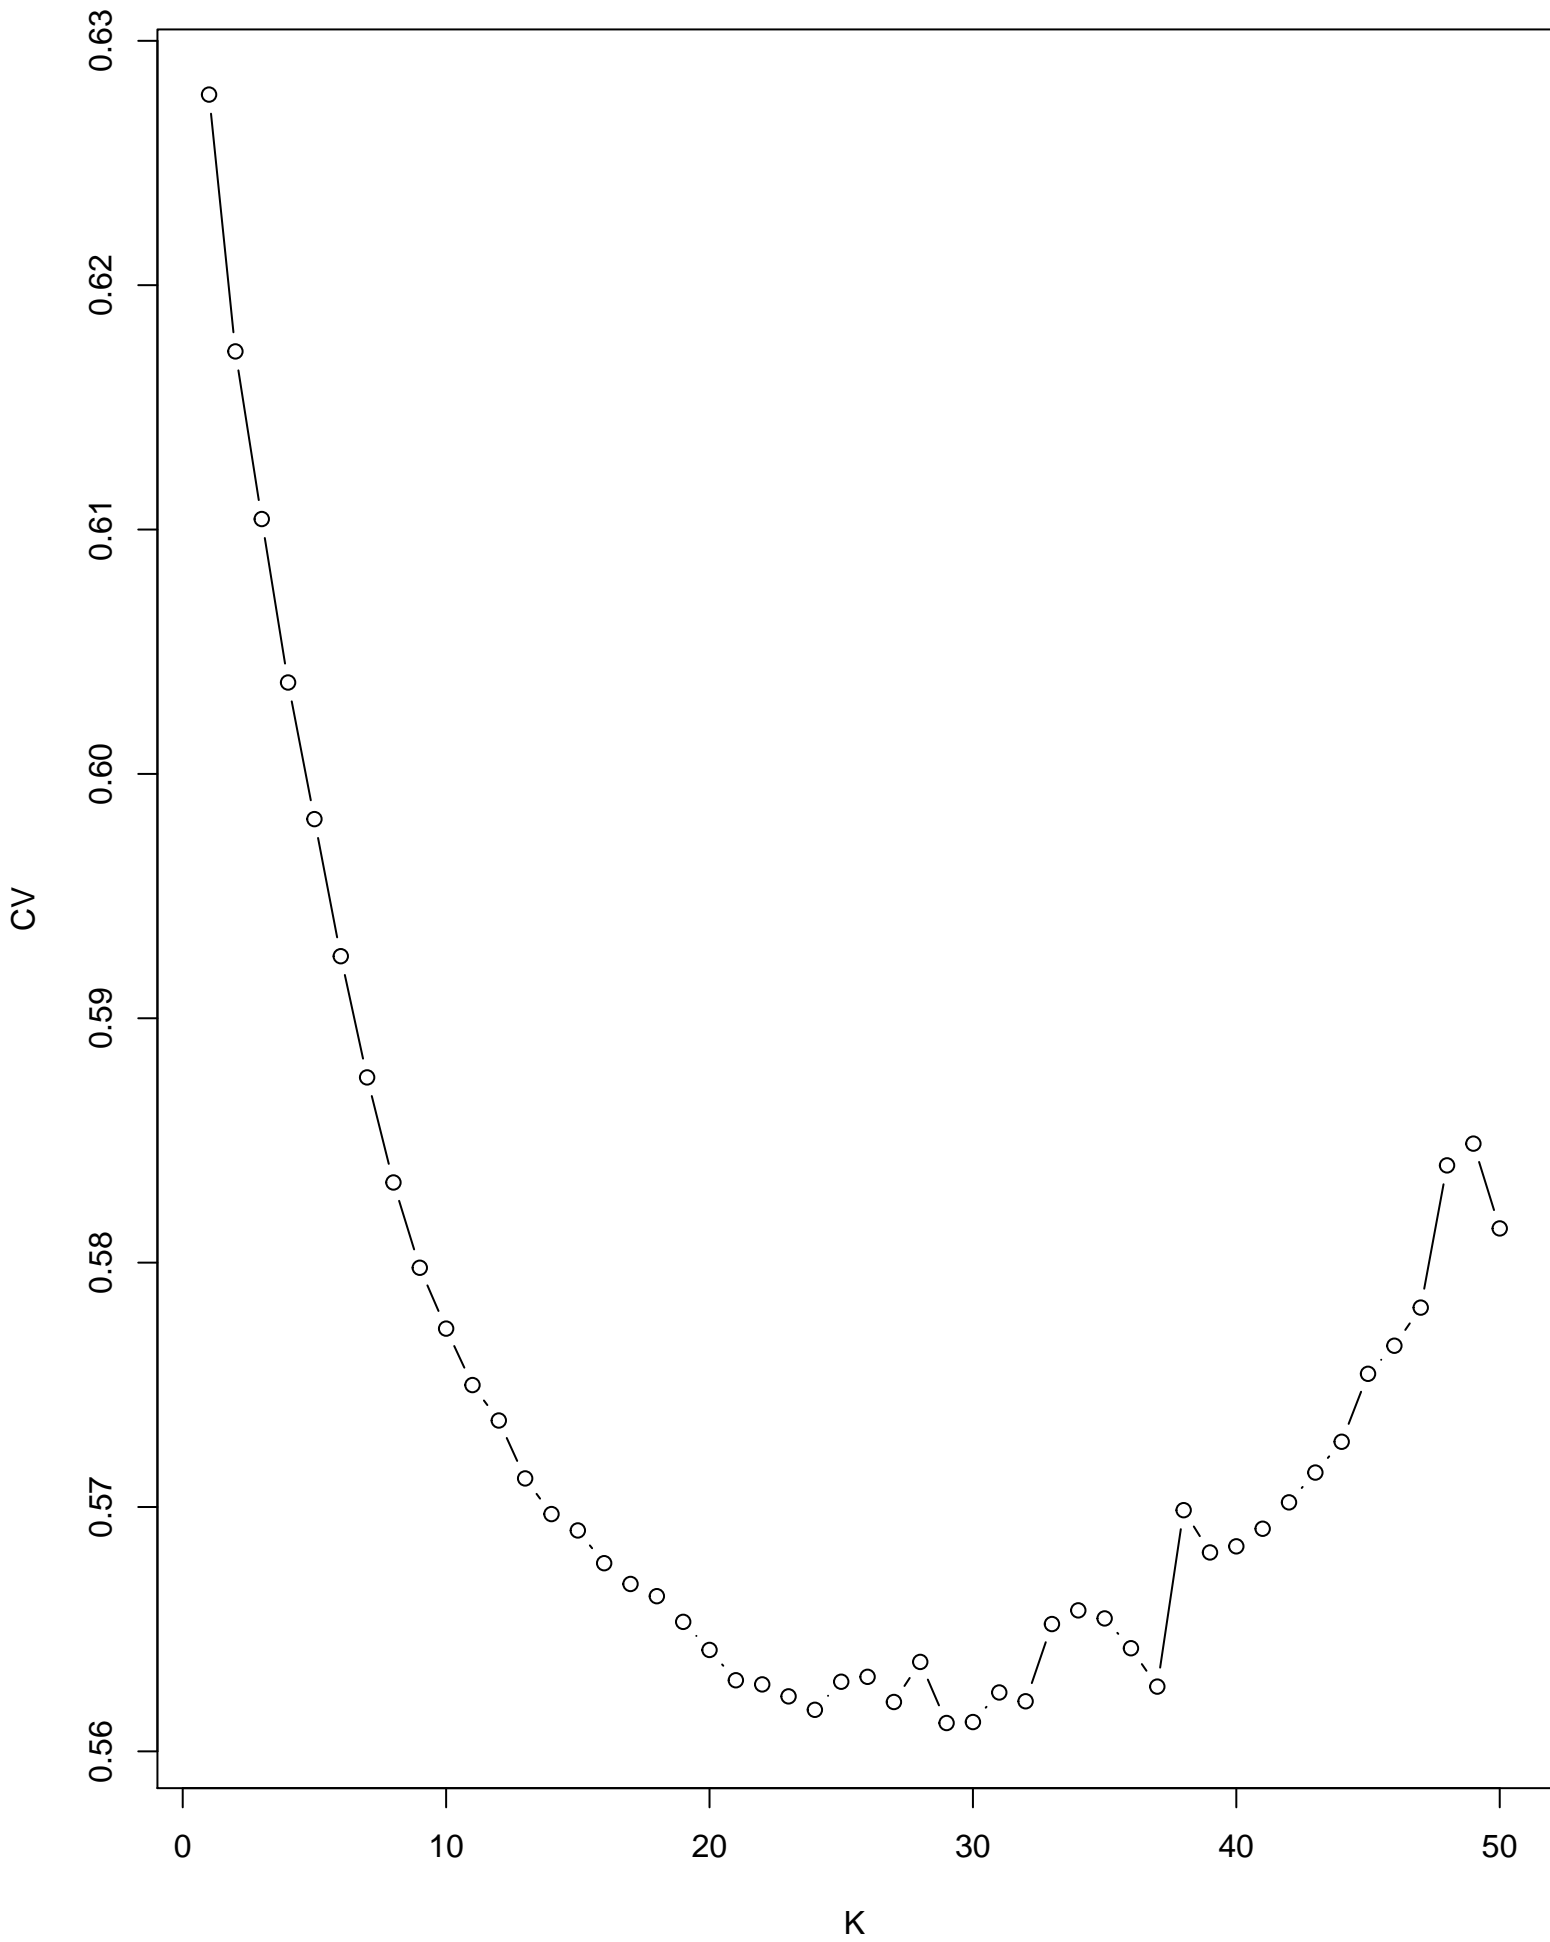

Supplement: 12711_2018_406_MOESM8_ESM.pdf [file 12711_2018_406_MOESM8_ESM.pdf]
